# Supplementary material for: Metabolic profiling of presymptomatic Huntington’s disease sheep reveals novel biomarkers
Source: PubMed Central journal article supplement (PMC5320451; doi:10.1038/srep43030), 2017-02-22
Supplement: srep43030-s1.pdf [file srep43030-s1.pdf]

**Metabolic profiling of presymptomatic Huntington's disease sheep reveals novel  
biomarkers**

Debra J. Skene<sup>1\*</sup>, Benita Middleton<sup>1</sup>, Cara K. Fraser<sup>2</sup>, Jeroen L.A. Pennings<sup>3</sup>, Timothy R.  
Kuchel<sup>2</sup>, Skye Rudiger<sup>4</sup>, C. Simon Bawden<sup>4</sup>, A. Jennifer Morton<sup>5\*</sup>

<sup>1</sup>Chronobiology, Faculty of Health and Medical Sciences, University of Surrey, Guildford GU2  
7XH, United Kingdom; <sup>2</sup>Preclinical, Imaging & Research Laboratories (PIRL), SAHMRI, Gilles  
Plains, Adelaide, Australia; <sup>3</sup>National Institute for Public Health and the Environment (RIVM),  
3720 BA Bilthoven, The Netherlands; <sup>4</sup>South Australian Research and Development Institute,  
Roseworthy, South Australia; <sup>5</sup>Department of Physiology, Development and Neuroscience,  
University of Cambridge, Downing Street, Cambridge CB2 3DY, United Kingdom.

\*Authors for Correspondence

Professor Jenny Morton: [ajm41@cam.ac.uk](mailto:ajm41@cam.ac.uk)

Professor Debra J. Skene: [d.skene@surrey.ac.uk](mailto:d.skene@surrey.ac.uk)

Key words: OVT73, wasting, urea, urea cycle, nitric oxide, branched chain amino acids,  
kynurenine, kynurenic acid, sphingolipids, sleep, circadian, neurodegeneration

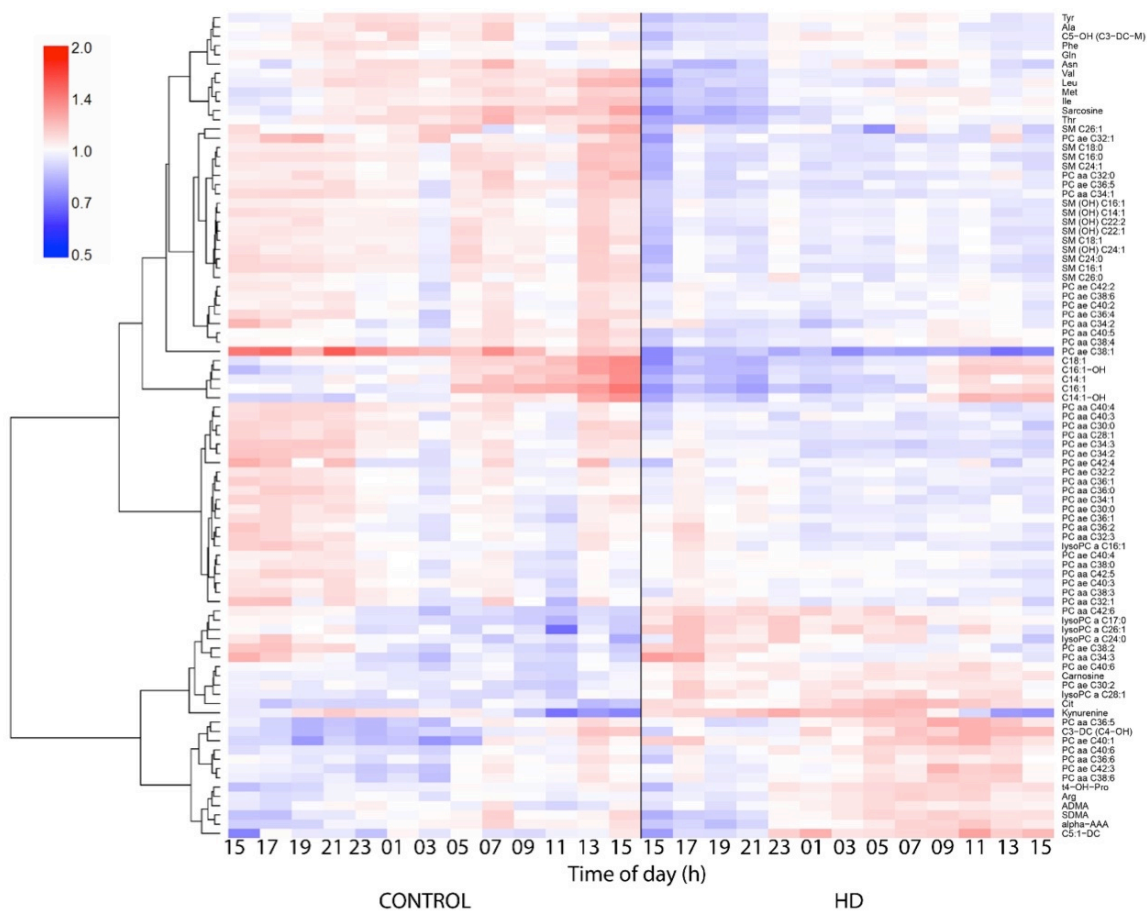

**Supplementary Figure 1 Heat map combined with hierarchical clustering (Euclidean distance and Ward linkage) of 89 metabolites showing significant changes between genotypes.** Metabolites were measured across a 24 h period (15:00 - 15:00 h) in both the control and HD sheep. Colour values are based on the relative value compared to the average value of each metabolite in the complete data set. Higher levels of metabolites are shown in red, lower levels are shown in blue.

## Metabolite Sets Enrichment Overview

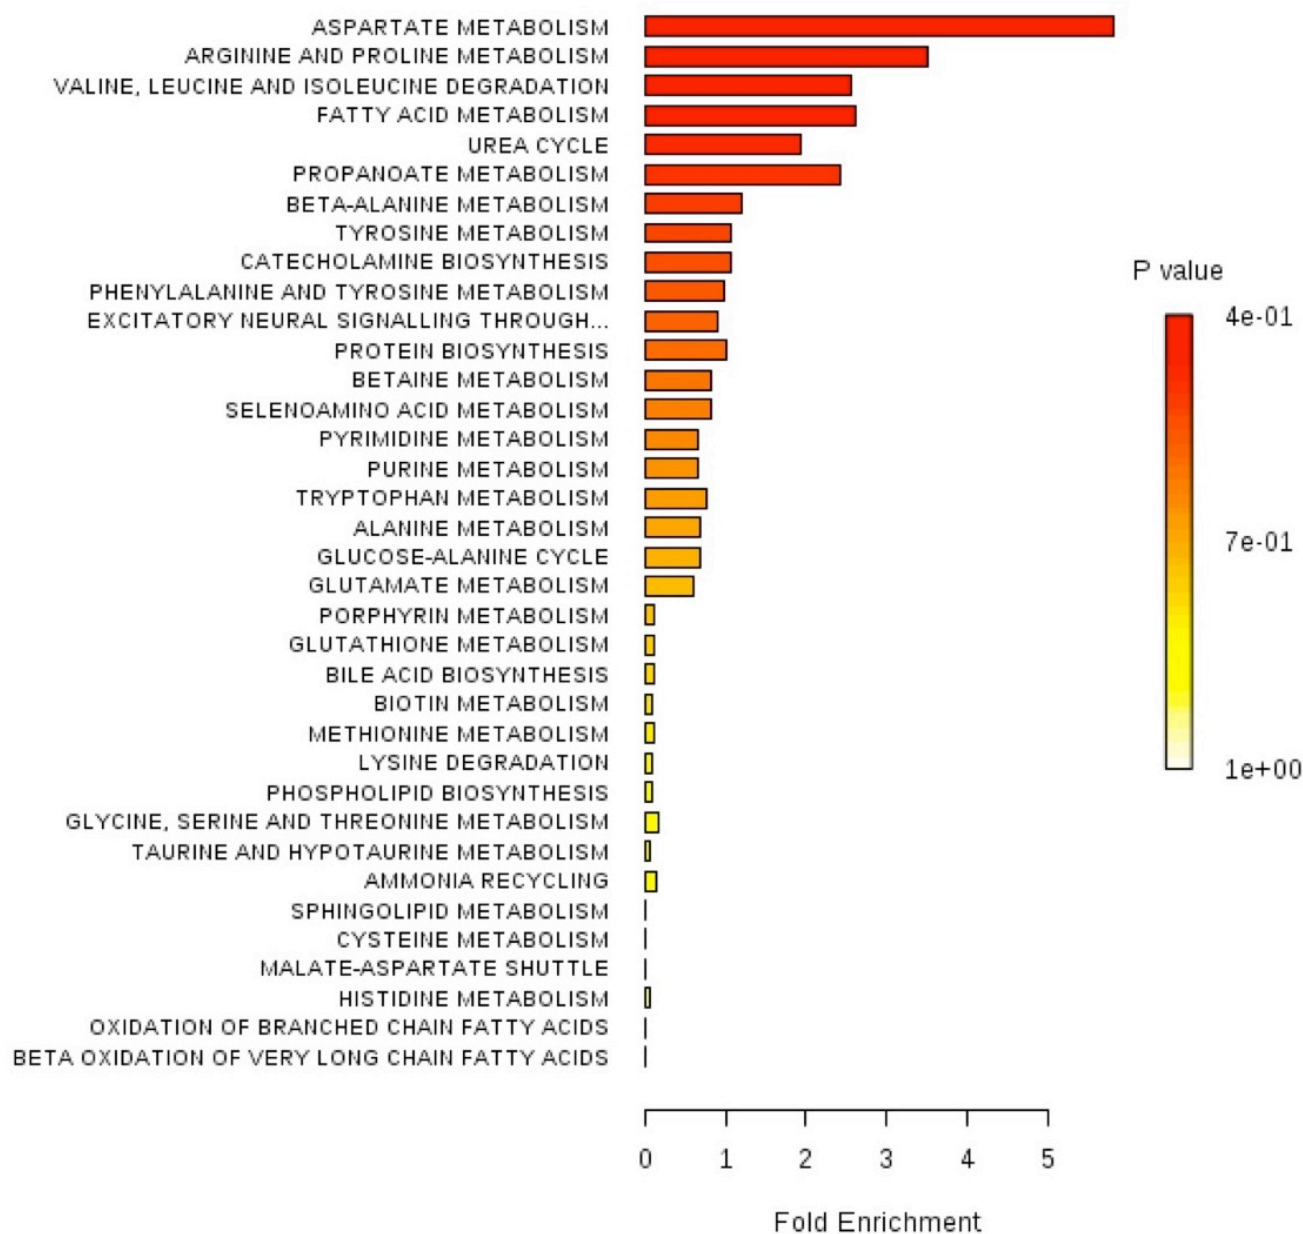

**Supplementary Figure 2 Summary plot for quantitative enrichment analysis performed using MetaboAnalyst 3.0.** An overview of the metabolite sets enriched is presented.

Supplement Table S1: p(corr) values of the measured metabolites in OPLS-DA models

comparing control and HD sheep.

| Metabolite                   | p(corr) | Metabolite                    | p(corr) | Metabolite                     |
|------------------------------|---------|-------------------------------|---------|--------------------------------|
| SM C16:0                     | -0.353  | PC aa C40:3                   | -0.121  | PC ae C40:5                    |
| Leucine                      | -0.338  | PC aa C38:4                   | -0.121  | Glutaconylcarnitine            |
| Hexadecenoylcarnitine        | -0.316  | PC ae C40:2                   | -0.119  | Creatinine                     |
| Valine                       | -0.314  | PC ae C42:4                   | -0.111  | Taurine                        |
| Tetradecenoylcarnitine       | -0.307  | Glutaryl carnitine            | -0.108  | PC ae C38:0                    |
| SM C18:0                     | -0.272  | Glutamine                     | -0.108  | PC aa C34:4                    |
| PC aa C30:0                  | -0.270  | PC ae C38:6                   | -0.091  | Glycine                        |
| SM C24:0                     | -0.265  | PC aa C40:5                   | -0.091  | Glutamate                      |
| SM C16:1                     | -0.264  | PC aa C38:3                   | -0.091  | PC aa C38:5                    |
| PC aa C28:1                  | -0.262  | Hydroxytetradecenoylcarnitine | -0.090  | Symmetric dimethylarginine     |
| Octadecenoylcarnitine        | -0.261  | PC aa C36:1                   | -0.089  | lysoPC a C20:3                 |
| Sarcosine                    | -0.257  | PC aa C42:4                   | -0.086  | lysoPC a C18:0                 |
| PC ae C36:5                  | -0.255  | PC ae C42:2                   | -0.084  | PC aa C36:6                    |
| Isoleucine                   | -0.254  | PC ae C40:4                   | -0.080  | PC aa C36:3                    |
| SM (OH) C14:1                | -0.245  | PC ae C40:3                   | -0.079  | alpha-aminodipic acid          |
| SM C24:1                     | -0.243  | PC aa C42:5                   | -0.079  | PC aa C42:1                    |
| PC ae C34:3                  | -0.242  | PC aa C34:2                   | -0.076  | PC aa C40:6                    |
| PC aa C32:0                  | -0.240  | PC ae C38:2                   | -0.062  | lysoPC a C24:0                 |
| SM C18:1                     | -0.233  | lysoPC a C28:0                | -0.060  | PC aa C38:6                    |
| SM (OH) C24:1                | -0.227  | lysoPC a C18:1                | -0.060  | PC ae C40:6                    |
| SM (OH) C22:1                | -0.220  | PC ae C36:1                   | -0.058  | Asymmetric dimethylarginine    |
| PC ae C38:1                  | -0.214  | PC aa C38:0                   | -0.058  | PC ae C42:3                    |
| PC ae C34:2                  | -0.207  | PC aa C36:2                   | -0.057  | Kynurenine                     |
| SM C26:1                     | -0.206  | lysoPC a C16:0                | -0.046  | PC aa C42:6                    |
| PC ae C32:1                  | -0.203  | lysoPC a C18:2                | -0.046  | PC aa C34:3                    |
| PC aa C40:4                  | -0.200  | SM C20:2                      | -0.040  | Malonylhydroxybutyrylcarnitine |
| PC aa C34:1                  | -0.197  | PC ae C38:4                   | -0.033  | trans-4-hydroxyproline         |
| SM (OH) C22:2                | -0.194  | Lysine                        | -0.022  | lysoPC a C28:1                 |
| Tyrosine                     | -0.189  | lysoPC a C26:0                | -0.022  | PC ae C30:2                    |
| Threonine                    | -0.177  | PC ae C36:3                   | -0.019  | PC ae C40:1                    |
| Hydroxyhexadecenoylcarnitine | -0.175  | Acetylcarnitine               | -0.012  | Carnosine                      |
| PC ae C36:4                  | -0.172  | lysoPC a C20:4                | -0.010  | lysoPC a C17:0                 |
| Hydroxyvalerylcarnitine      | -0.170  | Histidine                     | 0.001   | PC aa C36:5                    |
| Methionine                   | -0.161  | Tryptophan                    | 0.006   | lysoPC a C26:1                 |
| SM (OH) C16:1                | -0.160  | PC ae C34:0                   | 0.006   | Arginine                       |
| Alanine                      | -0.157  | PC aa C36:4                   | 0.007   | Citrulline                     |

|                |        |             |       |
|----------------|--------|-------------|-------|
| PC aa C32:3    | -0.150 | Serine      | 0.014 |
| lysoPC a C16:1 | -0.148 | PC ae C38:3 | 0.017 |
| PC ae C34:1    | -0.148 | Proline     | 0.019 |
| Phenylalanine  | -0.147 | PC ae C44:6 | 0.023 |
| PC ae C32:2    | -0.143 | Carnitine   | 0.025 |
| Asparagine     | -0.138 | PC ae C38:5 | 0.033 |
| PC ae C30:0    | -0.134 | PC ae C36:0 | 0.034 |
| PC aa C32:1    | -0.132 | Ornithine   | 0.036 |
| PC aa C36:0    | -0.131 | PC aa C40:2 | 0.039 |
| SM C26:0       | -0.122 | PC ae C36:2 | 0.042 |
| Serotonin      | -0.122 | PC ae C42:1 | 0.045 |

The rank order of the metabolites shown in Table S1 is also depicted in Figure 1c from left to right. The metabolites are colour coded according to metabolite class as follows: amino acids and biogenic amines (blue); acylcarnitines (green); lysophosphatidylcholine acyl (lyso PC a) (dark orange); phosphatidylcholine diacyl (PC aa) (yellow); phosphatidylcholine acyl-alkyl (PC ae) (light orange); sphingolipids (SM) (brown).

**Supplement Table S2: Comparison of the models shown in Figure 7.**

| Model   | Number of metabolites | Metabolites used       | AUC (95% CI)        | Sensitivity at 90% specificity (%) (95% CI) |
|---------|-----------------------|------------------------|---------------------|---------------------------------------------|
| Model_1 | 1                     | citrulline             | 0.664 (0.602-0.726) | 17.7 (3.9 - 43.1)                           |
| Model_2 | 2                     | citrulline + valine    | 0.702 (0.643-0.760) | 36.5 (18.8 - 51.4)                          |
| Model_3 | 3                     | above + PC aa C40:4    | 0.746 (0.691-0.802) | 50.8 (38.1 - 63)                            |
| Model_4 | 4                     | above + PC aa C36:5    | 0.775 (0.723-0.827) | 47.0 (34.3 - 60.2)                          |
| Model_5 | 5                     | above + lysoPC a C17:0 | 0.813 (0.767-0.859) | 56.6 (47.5 - 66.3)                          |
| Model_6 | 6                     | above + SM (OH) C24:1  | 0.878 (0.841-0.915) | 68.5 (57.5 - 76.3)                          |
| Model_7 | 7                     | above + threonine      | 0.935 (0.910-0.960) | 81.2 (73.5 - 86.7)                          |
| Model_8 | 8                     | above + C14:1          | 0.938 (0.913-0.963) | 80.1 (71.3 - 88.4)                          |
